# Supplementary material for: Single-metal atom sandwiched by graphdiyne and BN-doped graphdiyne sheets as an electrocatalyst for nitrogen reduction: a first-principles study
Source: Royal Society of Chemistry journal article supplement (doi:10.1039/d2cp04898a), 2023-01-01
Supplement: d2cp04898a1.pdf [file d2cp04898a1.pdf]

**Single-Metal Atom Sandwiched by Graphdiyne and BN-Doped Graphdiyne  
Sheets as an Electrocatalyst for Nitrogen Reduction: A First-Principles Study**

Manqi Li,<sup>ab</sup> Zhenhua Liu<sup>b</sup>, Tian Gao<sup>b</sup>, Shiyao Liu<sup>b</sup>, Hong Yu<sup>b</sup>, Zhao Wang<sup>a\*</sup>, and Hao Sun<sup>b\*</sup>

<sup>a</sup> Institute of Functional Material Chemistry, Faculty of Chemistry, Northeast Normal  
University, Changchun 130024, China

Email: [wangzhao@jlnu.edu.cn](mailto:wangzhao@jlnu.edu.cn); [sunh600@nenu.edu.cn](mailto:sunh600@nenu.edu.cn)

**Table S1.** Calculated binding energies (in eV) of a TM atom sandwiched between graphdiyne and BN-doped graphdiyne.

| TM atom | $E_b^1$ (eV) | $E_b^2$ (eV) |
|---------|--------------|--------------|
| Sc      | -8.27        | -4.28        |
| Ti      | -8.92        | -5.51        |
| V       | -7.81        | -5.60        |
| Cr      | -4.69        | -2.24        |
| Mn      | -5.24        | -3.40        |
| Fe      | -6.41        | -4.74        |
| Co      | -6.93        | -5.57        |
| Ni      | -6.62        | -5.59        |
| Cu      | -4.92        | -3.37        |

$E_b^1$  is calculated as  $E_b = E_{\text{BN-TM-G}} - E_G - E_{\text{BN}} - E_{\text{TM}}$  where the  $E_{\text{BN-TM-G}}$ ,  $E_G$ ,  $E_{\text{BN}}$  and  $E_{\text{TM}}$  are total energies of sandwich structures BN/TM/G, pure graphdiyne, BN-doped graphdiyne and single TM atoms, respectively.

$E_b^2$  is calculated as  $E_b = E_{\text{TM-G}} - E_G - E_{\text{TM}}$  where  $E_{\text{TM-G}}$ ,  $E_G$  and  $E_{\text{TM}}$  are total energies of graphdiyne with TM atom adsorption, pure graphdiyne and single TM atoms, respectively.

**Table S2.** Calculated results for the N<sub>2</sub> adsorption on the BN-TM-G, including the N<sub>2</sub> adsorption energies ( $E_{\text{ads}}$ ), the N<sub>2</sub> adsorption free energy ( $\Delta G(^*N_2)$ ) and the N–N bond length ( $d_{\text{N-N}}$ ).

| <b>BN-TM-G</b> | $E_{\text{ads}}$ (eV) | $\Delta G(^*N_2)$ (eV) | $d_{\text{N-N}}$ (Å) |
|----------------|-----------------------|------------------------|----------------------|
| <b>BN-Sc-G</b> | -0.45                 | -0.10                  | 1.116                |
| <b>BN-Ti-G</b> | -0.49                 | -0.12                  | 1.115                |
| <b>BN-V-G</b>  | -0.53                 | -0.13                  | 1.115                |
| <b>BN-Cr-G</b> | -0.45                 | -0.05                  | 1.116                |
| <b>BN-Mn-G</b> | -0.47                 | -0.03                  | 1.114                |
| <b>BN-Fe-G</b> | -0.49                 | -0.16                  | 1.116                |
| <b>BN-Co-G</b> | -0.50                 | -0.13                  | 1.115                |
| <b>BN-Ni-G</b> | -0.43                 | -0.05                  | 1.114                |
| <b>BN-Cu-G</b> | -0.44                 | -0.06                  | 1.115                |

**Table S3.** Total energy ( $E_{\text{tot}}$ ), zero-potential correction energy ( $E_{\text{zpe}}$ ), entropy contribution ( $TS$ ,  $T = 298.15$  K) of free molecules from NIST database.

| <b>Speciесе</b>          | <b><math>E_{\text{tot}}</math> (eV)</b> | <b><math>E_{\text{zpe}}</math> (eV)</b> | <b><math>TS</math> (eV)</b> |
|--------------------------|-----------------------------------------|-----------------------------------------|-----------------------------|
| <b>H<sub>2</sub>(g)</b>  | -6.67                                   | 0.27                                    | 0.40                        |
| <b>N<sub>2</sub>(g)</b>  | -16.32                                  | 0.14                                    | 0.59                        |
| <b>NH<sub>3</sub>(g)</b> | -19.73                                  | 0.60                                    | 0.89                        |

**Table S4.** Total energy ( $E_{\text{tot}}$ ), zero-potential correction energy ( $E_{\text{zpe}}$ ) and entropy contribution ( $TS$ ,  $T = 298.15$  K) of the optimized intermediates for  $\text{N}_2$  electroreduction to  $\text{NH}_3$  on the BN-Sc-G.

| <b>BN-Sc-G</b>             | <b><math>E_{\text{tot}}</math> (eV)</b> | <b><math>E_{\text{zpe}}</math> (eV)</b> | <b><math>TS</math> (eV)</b> |
|----------------------------|-----------------------------------------|-----------------------------------------|-----------------------------|
| * $\text{N}_2$             | -839.432                                | 0.17                                    | 0.27                        |
| * $\text{NNH}$             | -842.589                                | 0.50                                    | 0.17                        |
| * $\text{NNH}_2$           | -846.311                                | 0.82                                    | 0.16                        |
| * $\text{NNH}_3$           | -850.145                                | 1.20                                    | 0.13                        |
| * $\text{NH}$              | -834.485                                | 0.37                                    | 0.07                        |
| * $\text{NH}_2$            | -840.676                                | 0.73                                    | 0.07                        |
| * $\text{NH}_3$            | -843.606                                | 1.07                                    | 0.07                        |
| * $\text{NHNH}$            | -846.797                                | 0.83                                    | 0.14                        |
| * $\text{NHNH}_2$          | -851.332                                | 1.17                                    | 0.19                        |
| * $\text{NH}_2\text{NH}_2$ | -854.741                                | 1.55                                    | 0.16                        |
| * $\text{NH}_2\text{NH}_3$ | -860.310                                | 1.67                                    | 0.28                        |

**Table S5.** Total energy ( $E_{\text{tot}}$ ), zero-potential correction energy ( $E_{\text{zpe}}$ ) and entropy contribution ( $TS$ ,  $T = 298.15$  K) of the optimized intermediates for  $\text{N}_2$  electroreduction to  $\text{NH}_3$  on the BN-Ti-G.

| <b>BN-Ti-G</b>             | <b><math>E_{\text{tot}}</math> (eV)</b> | <b><math>E_{\text{zpe}}</math> (eV)</b> | <b><math>TS</math> (eV)</b> |
|----------------------------|-----------------------------------------|-----------------------------------------|-----------------------------|
| * $\text{N}_2$             | -839.825                                | 0.16                                    | 0.24                        |
| * $\text{NNH}$             | -842.952                                | 0.52                                    | 0.13                        |
| * $\text{NNH}_2$           | -846.923                                | 0.84                                    | 0.14                        |
| * $\text{NNH}_3$           | -850.703                                | 1.20                                    | 0.12                        |
| * $\text{NH}$              | -834.866                                | 0.37                                    | 0.07                        |
| * $\text{NH}_2$            | -840.732                                | 0.73                                    | 0.07                        |
| * $\text{NH}_3$            | -844.197                                | 1.08                                    | 0.07                        |
| * $\text{NHNH}$            | -847.259                                | 0.84                                    | 0.14                        |
| * $\text{NHNH}_2$          | -851.496                                | 1.20                                    | 0.16                        |
| * $\text{NH}_2\text{NH}_2$ | -854.757                                | 1.55                                    | 0.18                        |
| * $\text{NH}_2\text{NH}_3$ | -860.424                                | 1.68                                    | 0.20                        |

**Table S6.** Total energy ( $E_{\text{tot}}$ ), zero-potential correction energy ( $E_{\text{zpe}}$ ) and entropy contribution ( $TS$ ,  $T = 298.15$  K) of the optimized intermediates for  $\text{N}_2$  electroreduction to  $\text{NH}_3$  on the BN-V-G.

| <b>BN-V-G</b>              | <b><math>E_{\text{tot}}</math> (eV)</b> | <b><math>E_{\text{zpe}}</math> (eV)</b> | <b><math>TS</math> (eV)</b> |
|----------------------------|-----------------------------------------|-----------------------------------------|-----------------------------|
| * $\text{N}_2$             | -839.452                                | 0.17                                    | 0.22                        |
| * $\text{NNH}$             | -842.571                                | 0.50                                    | 0.11                        |
| * $\text{NNH}_2$           | -846.733                                | 0.83                                    | 0.15                        |
| * $\text{NNH}_3$           | -849.921                                | 1.18                                    | 0.12                        |
| * $\text{NH}$              | -834.696                                | 0.36                                    | 0.08                        |
| * $\text{NH}_2$            | -840.579                                | 0.74                                    | 0.07                        |
| * $\text{NH}_3$            | -843.342                                | 1.08                                    | 0.09                        |
| * $\text{NHNH}$            | -847.020                                | 0.84                                    | 0.14                        |
| * $\text{NHNH}_2$          | -851.759                                | 1.19                                    | 0.14                        |
| * $\text{NH}_2\text{NH}_2$ | -854.520                                | 1.54                                    | 0.18                        |
| * $\text{NH}_2\text{NH}_3$ | -860.393                                | 1.67                                    | 0.20                        |

**Table S7.** Total energy ( $E_{\text{tot}}$ ), zero-potential correction energy ( $E_{\text{zpe}}$ ) and entropy contribution ( $TS$ ,  $T = 298.15$  K) of the optimized intermediates for  $\text{N}_2$  electroreduction to  $\text{NH}_3$  on the BN-Cr-G.

| <b>BN-Cr-G</b>             | <b><math>E_{\text{tot}}</math> (eV)</b> | <b><math>E_{\text{zpe}}</math> (eV)</b> | <b><math>TS</math> (eV)</b> |
|----------------------------|-----------------------------------------|-----------------------------------------|-----------------------------|
| * $\text{N}_2$             | -839.426                                | 0.17                                    | 0.22                        |
| * $\text{NNH}$             | -842.584                                | 0.50                                    | 0.16                        |
| * $\text{NNH}_2$           | -846.579                                | 0.83                                    | 0.15                        |
| * $\text{NNH}_3$           | -850.438                                | 1.20                                    | 0.14                        |
| * $\text{NH}$              | -834.878                                | 0.37                                    | 0.07                        |
| * $\text{NH}_2$            | -840.736                                | 0.73                                    | 0.08                        |
| * $\text{NH}_3$            | -843.873                                | 1.08                                    | 0.08                        |
| * $\text{NHNH}$            | -846.895                                | 0.84                                    | 0.14                        |
| * $\text{NHNH}_2$          | -851.459                                | 1.17                                    | 0.14                        |
| * $\text{NH}_2\text{NH}_2$ | -854.654                                | 1.53                                    | 0.17                        |
| * $\text{NH}_2\text{NH}_3$ | -860.483                                | 1.68                                    | 0.25                        |



**Table S8.** Total energy ( $E_{\text{tot}}$ ), zero-potential correction energy ( $E_{\text{zpe}}$ ) and entropy contribution ( $TS$ ,  $T = 298.15$  K) of the optimized intermediates for  $\text{N}_2$  electroreduction to  $\text{NH}_3$  on the BN-Mn-G.

| <b>BN-Mn-G</b>             | <b><math>E_{\text{tot}}</math> (eV)</b> | <b><math>E_{\text{zpe}}</math> (eV)</b> | <b><math>TS</math> (eV)</b> |
|----------------------------|-----------------------------------------|-----------------------------------------|-----------------------------|
| * $\text{N}_2$             | -839.668                                | 0.16                                    | 0.17                        |
| * $\text{NNH}$             | -842.445                                | 0.50                                    | 0.16                        |
| * $\text{NNH}_2$           | -846.249                                | 0.83                                    | 0.11                        |
| * $\text{NNH}_3$           | -849.710                                | 1.18                                    | 0.17                        |
| * $\text{NH}$              | -834.086                                | 0.34                                    | 0.09                        |
| * $\text{NH}_2$            | -840.192                                | 0.73                                    | 0.07                        |
| * $\text{NH}_3$            | -843.658                                | 1.06                                    | 0.08                        |
| * $\text{NHNH}$            | -846.968                                | 0.84                                    | 0.14                        |
| * $\text{NHNH}_2$          | -851.510                                | 1.19                                    | 0.14                        |
| * $\text{NH}_2\text{NH}_2$ | -855.038                                | 1.54                                    | 0.18                        |
| * $\text{NH}_2\text{NH}_3$ | -860.156                                | 1.67                                    | 0.26                        |

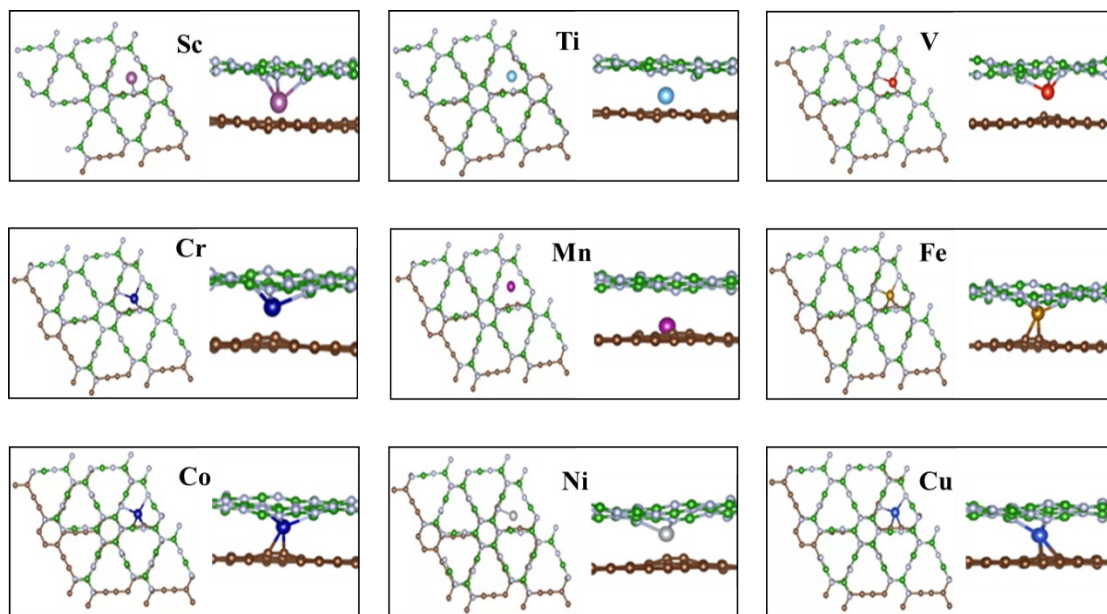

**Figure S1.** Top and side views of geometrical structures of BN-TM-G.

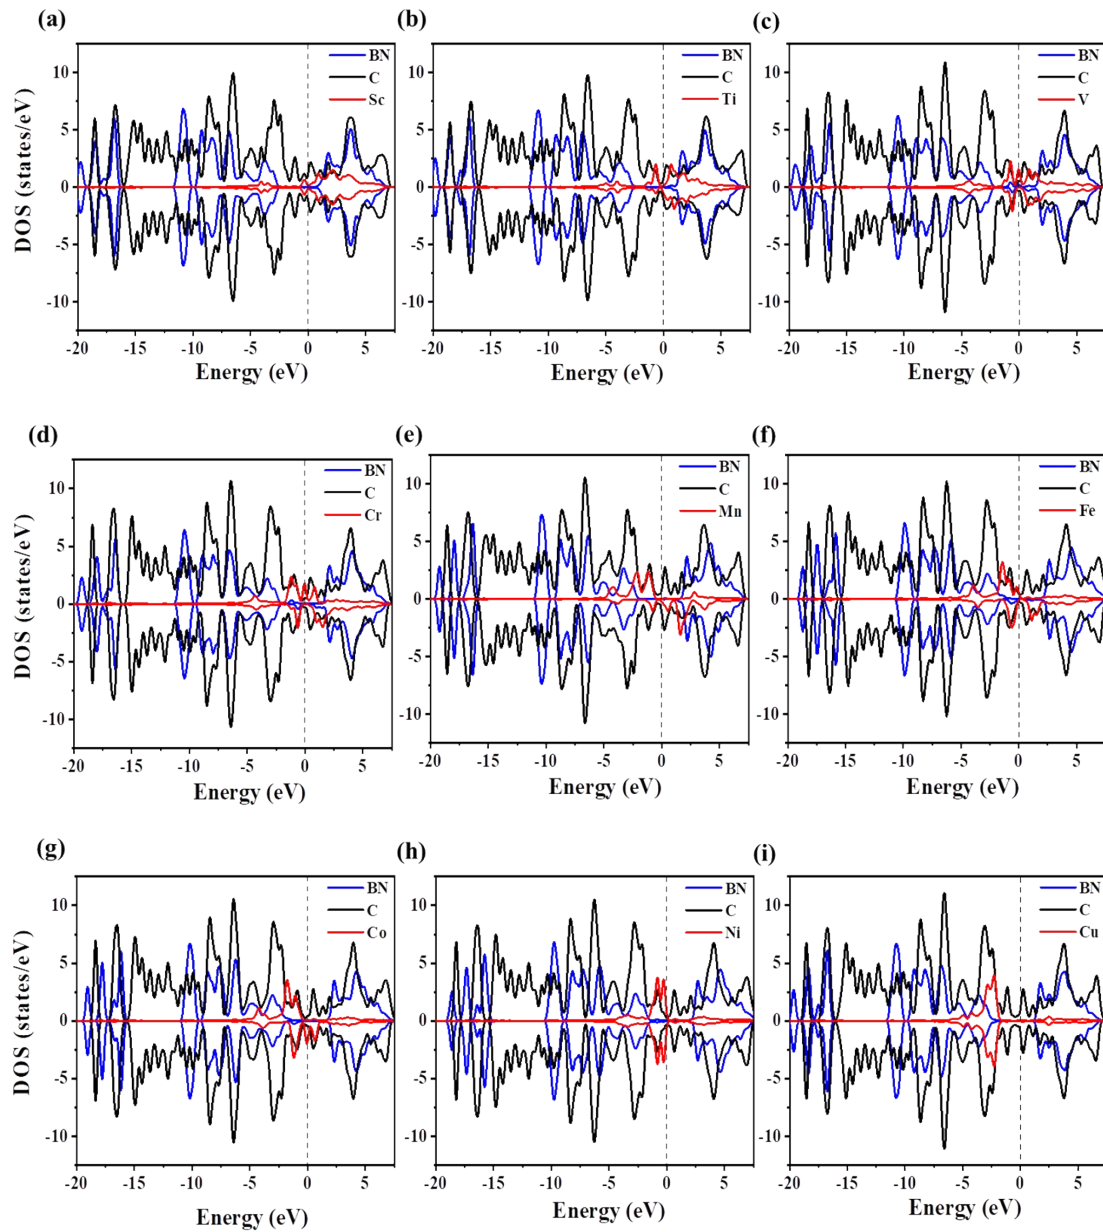

**Figure S2.** The calculated density of states of : (a) BN-Sc-G, (b) BN-Ti-G, (c) BN-V-G, (d) BN-Cr-G, (e) BN-Mn-G, (f) BN-Fe-G, (g) BN-Co-G, (h) BN-Ni-G and (i) BN-Cu-G. The Fermi level is set as zero in dotted lines.

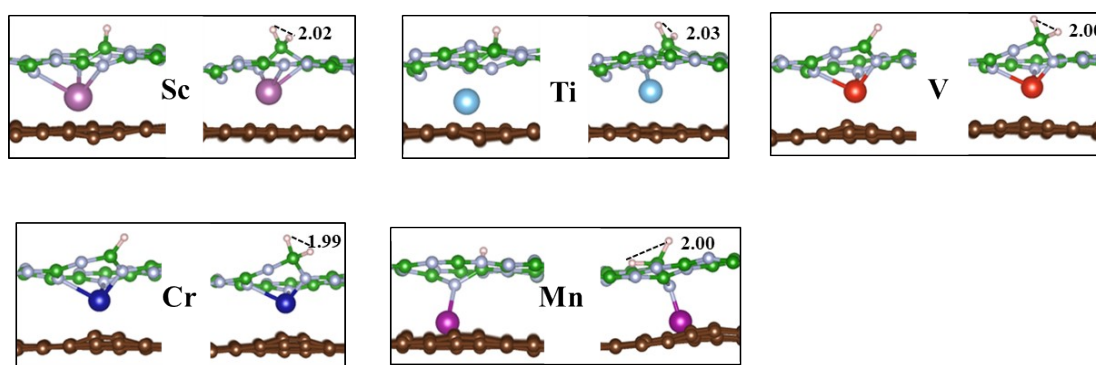

**Figure S3.** Optimized structures for the adsorption of one H atom and two H atoms on BN-TM-G.

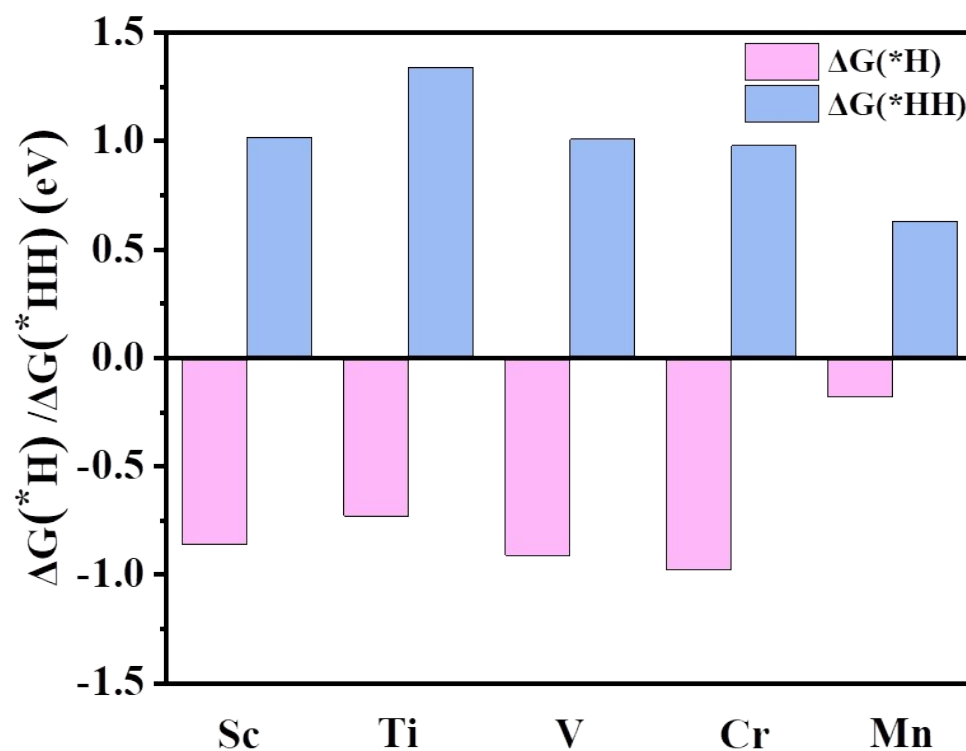

**Figure S4.** Calculated adsorption free energies for the first H atoms ( $\Delta G(*H)$  in eV) and the second H atoms ( $\Delta G(*HH)$  in eV) on the BN/Sc/G, BN/Ti/G, BN/V/G, BN/Cr/G and BN/Mn/G catalysts.
