# Supplementary figures and images for: Single-metal atom sandwiched by graphdiyne and BN-doped graphdiyne sheets as an electrocatalyst for nitrogen reduction: a first-principles study
Source: Royal Society of Chemistry journal article supplement (doi:10.1039/d2cp04898a), 2023-01-01

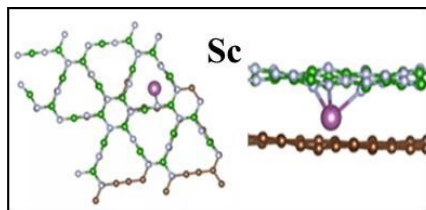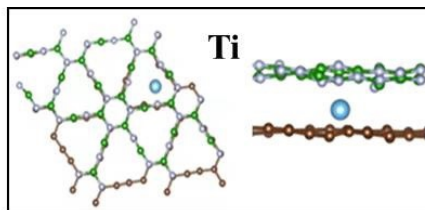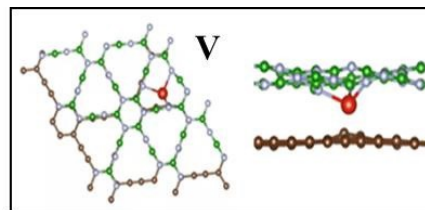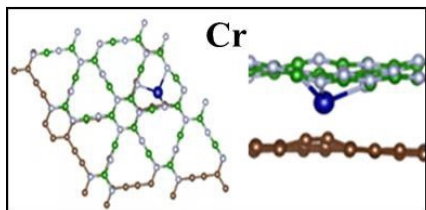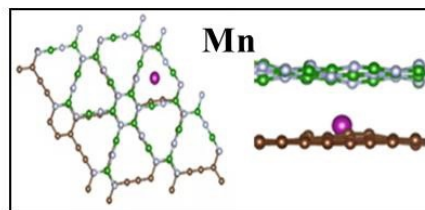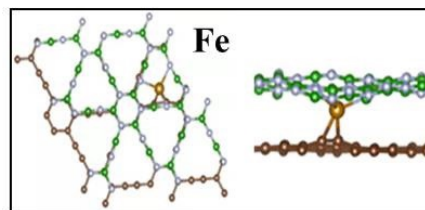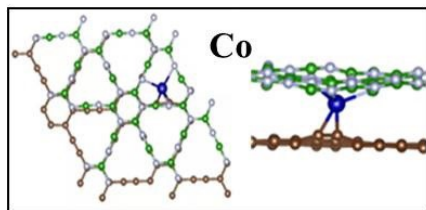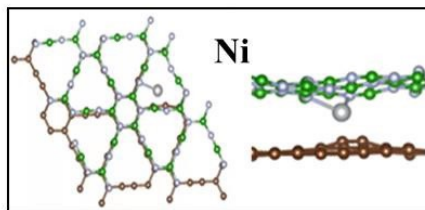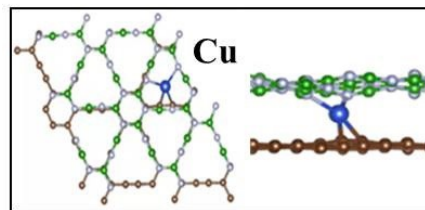

Supplement: d2cp04898a3.pdf [file d2cp04898a3.pdf]

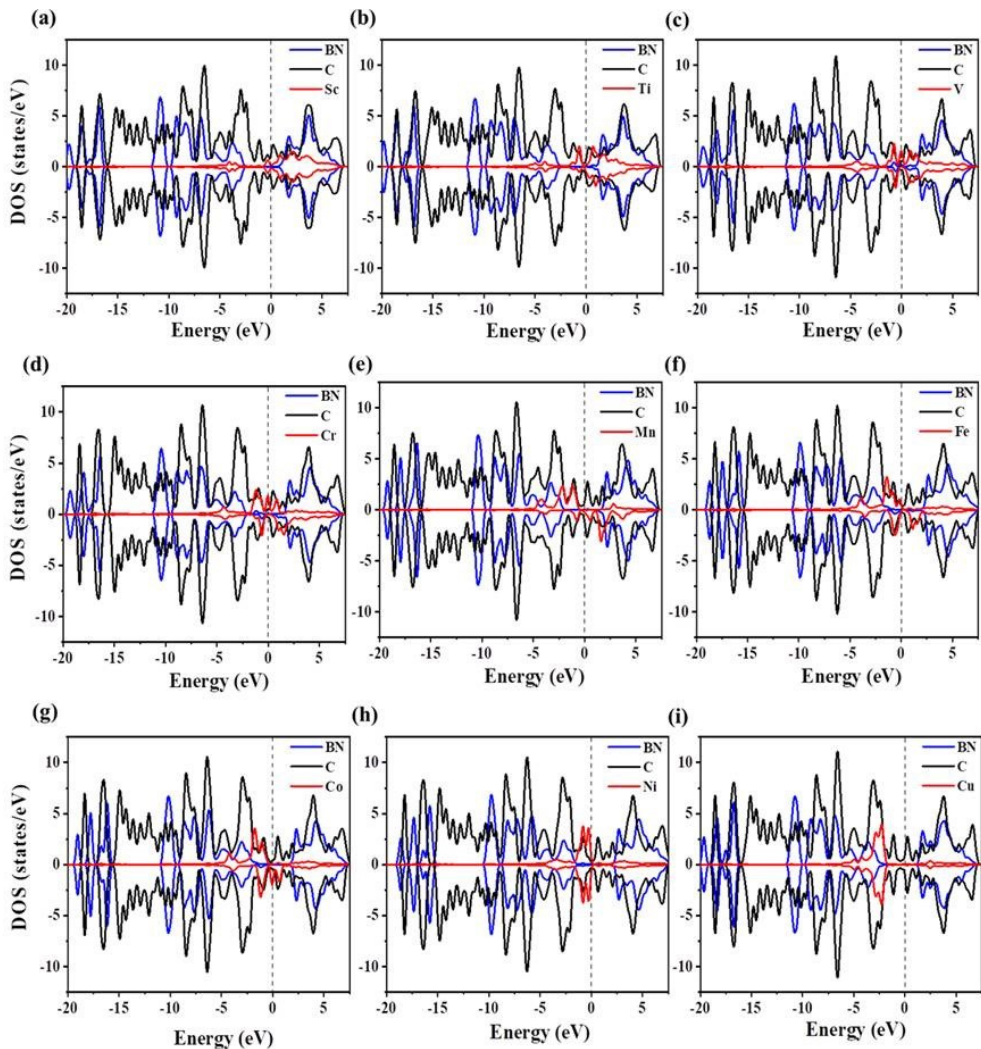

Supplement: d2cp04898a4.pdf [file d2cp04898a4.pdf]

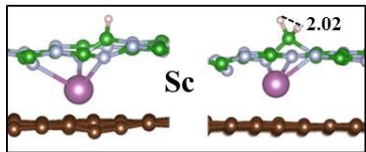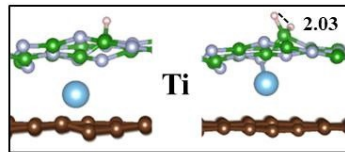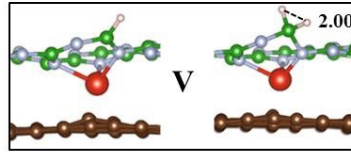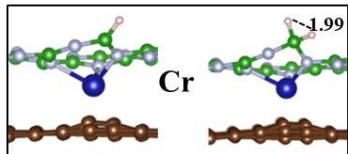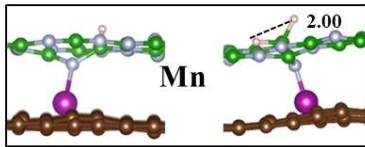

Supplement: d2cp04898a5.pdf [file d2cp04898a5.pdf]

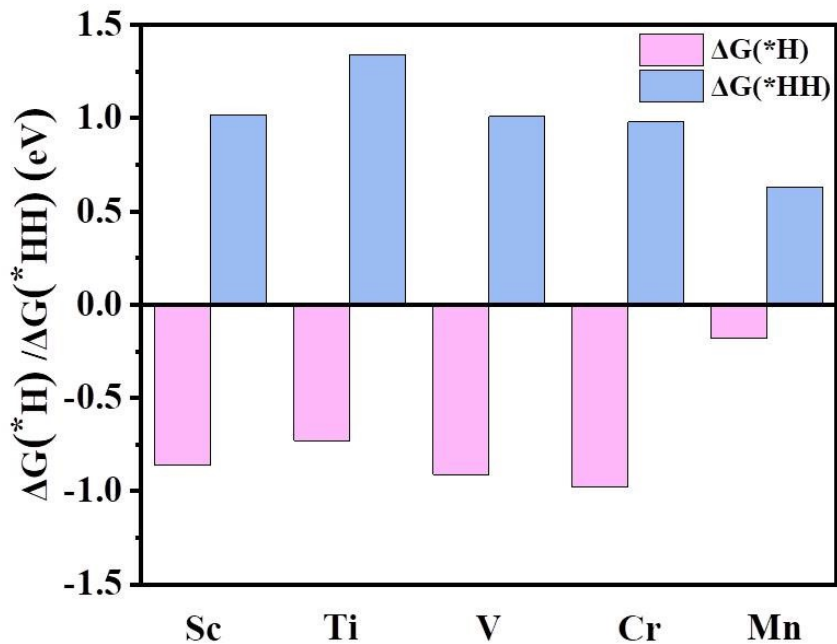

Supplement: d2cp04898a6.pdf [file d2cp04898a6.pdf]
